# Supplementary figures and images for: A Systems-Level Analysis Reveals Circadian Regulation of Splicing in Colorectal Cancer
Source: PubMed Central journal article supplement — eBioMedicine. 2018 Jun 21;33:68–81. doi: 10.1016/j.ebiom.2018.06.012 (PMC6085510; doi:10.1016/j.ebiom.2018.06.012), 2018-06-21

**a**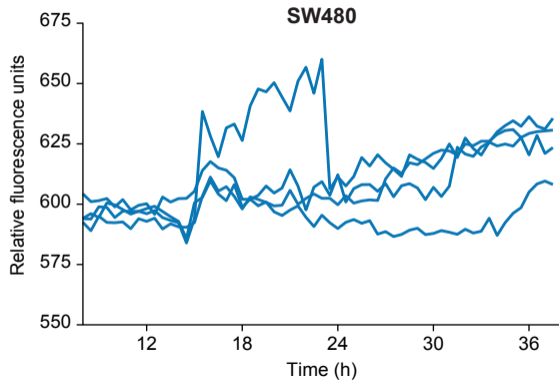**b**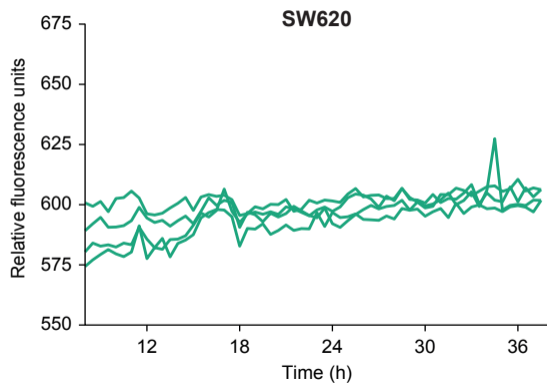

Supplement: mmc1.pdf [file mmc1.pdf]

**a**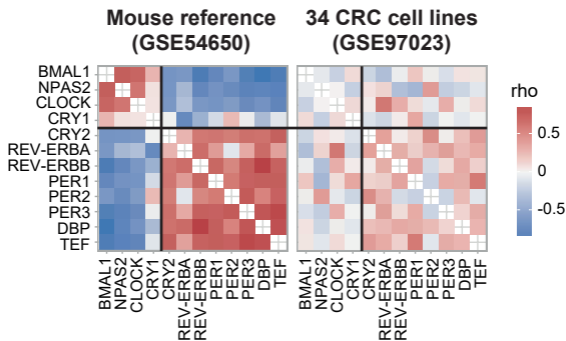**b**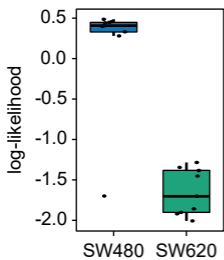**c**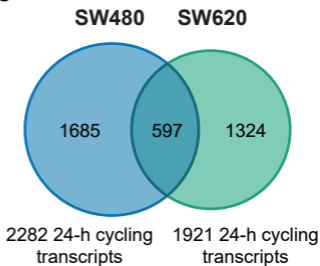**d**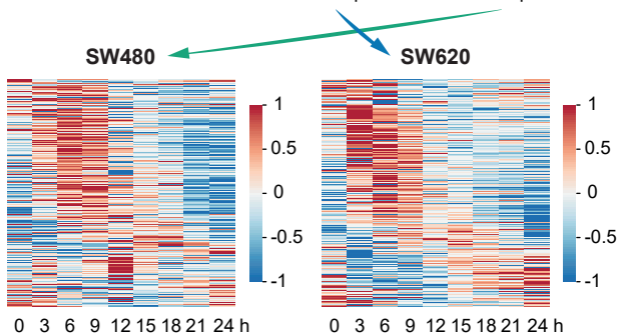

Supplement: mmc2.pdf [file mmc2.pdf]

### higher amplitude in SW480

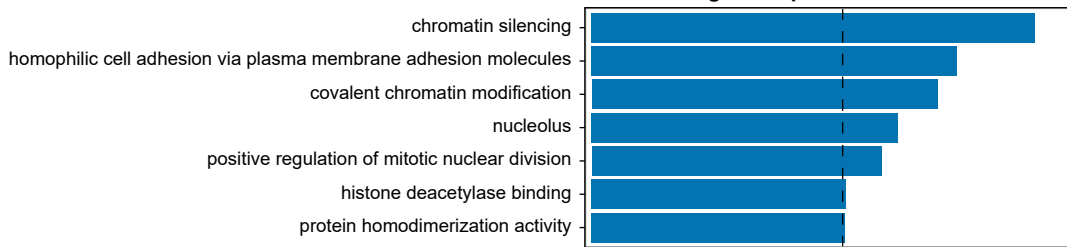

### higher amplitude in SW620

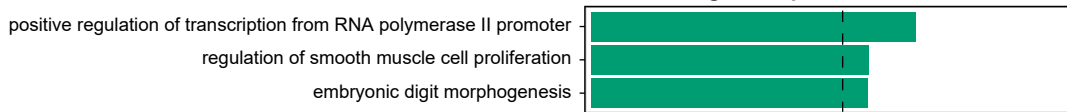

### pure phase shift

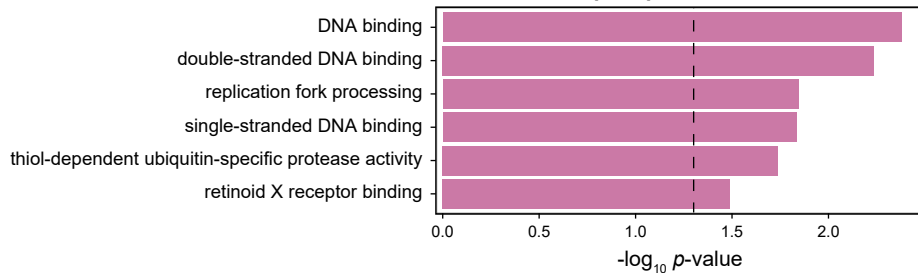

Supplement: mmc3.pdf [file mmc3.pdf]

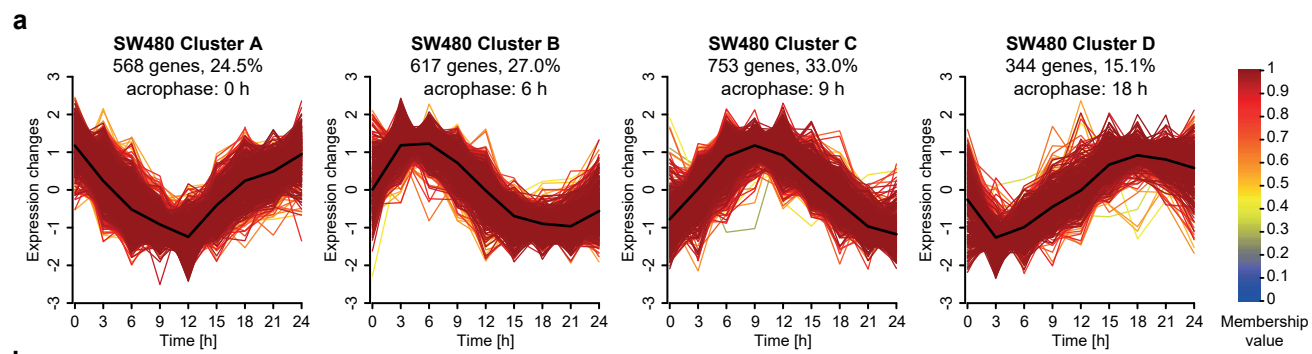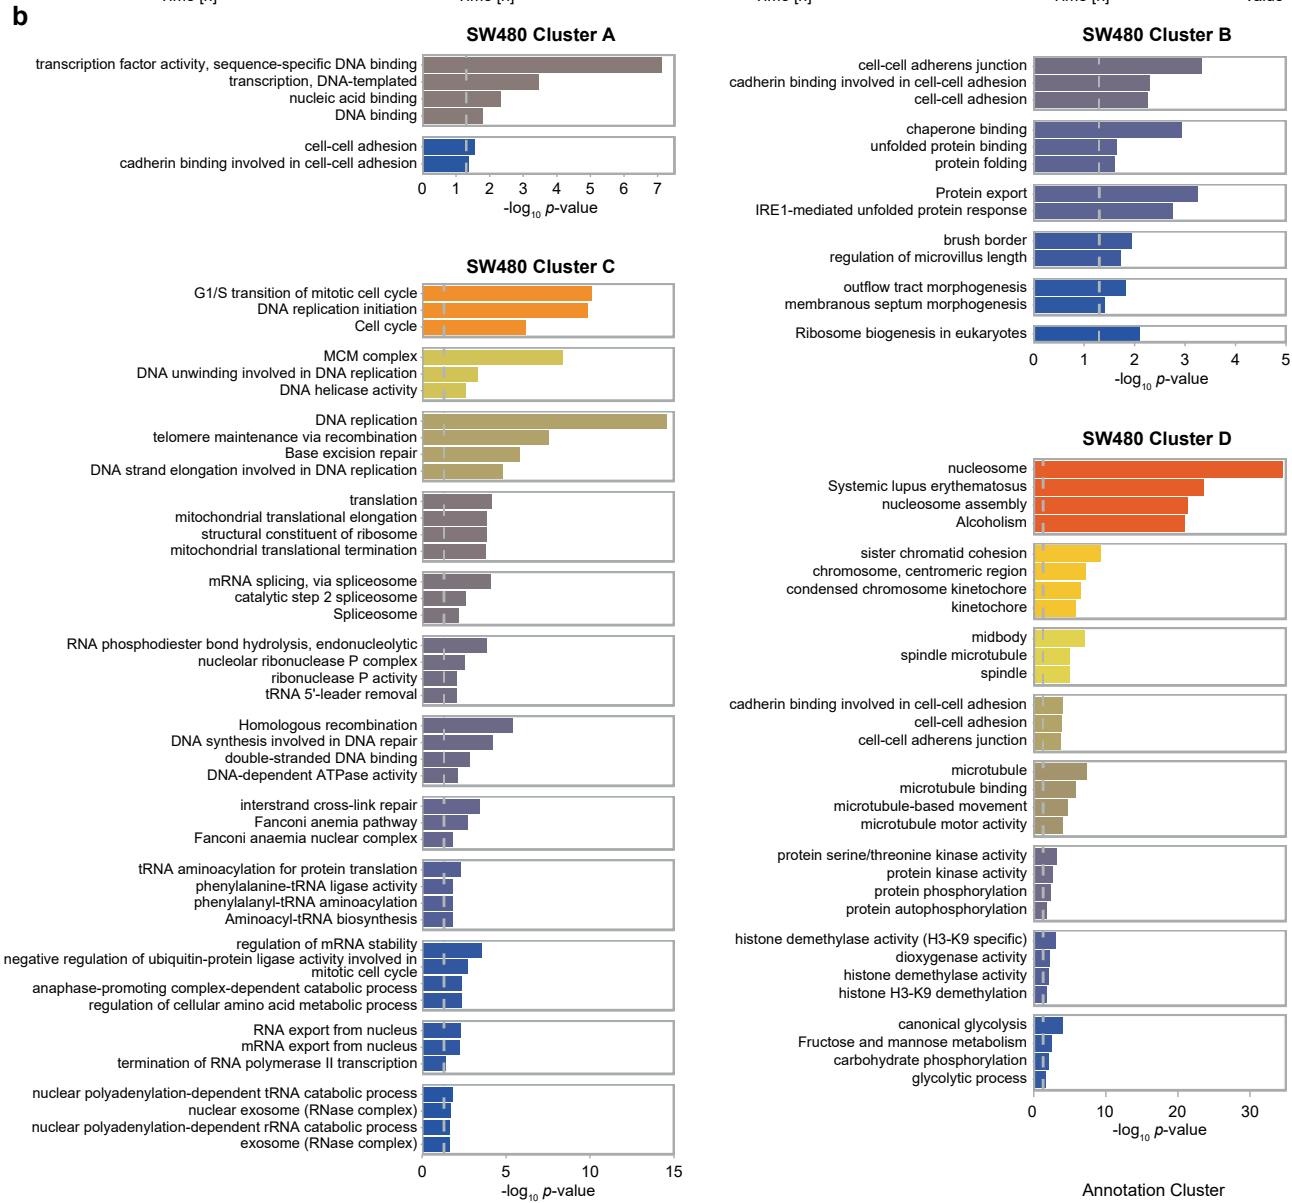

Supplement: mmc4.pdf [file mmc4.pdf]

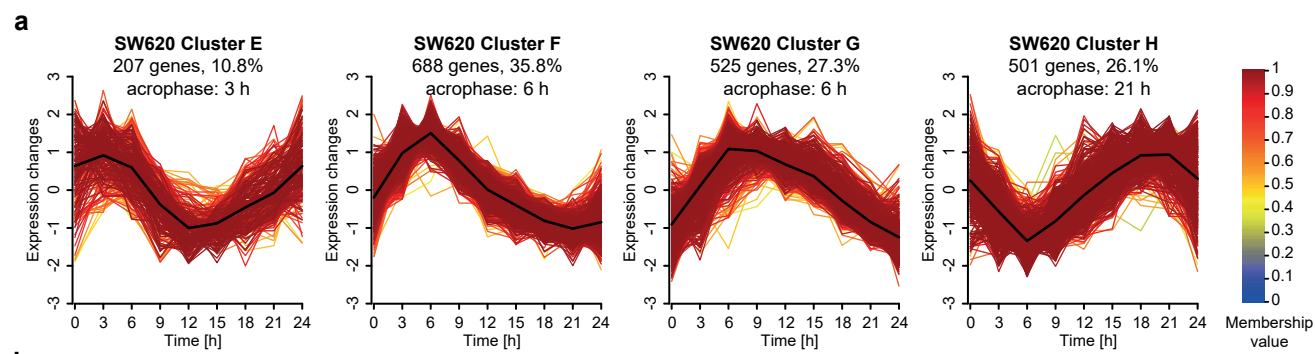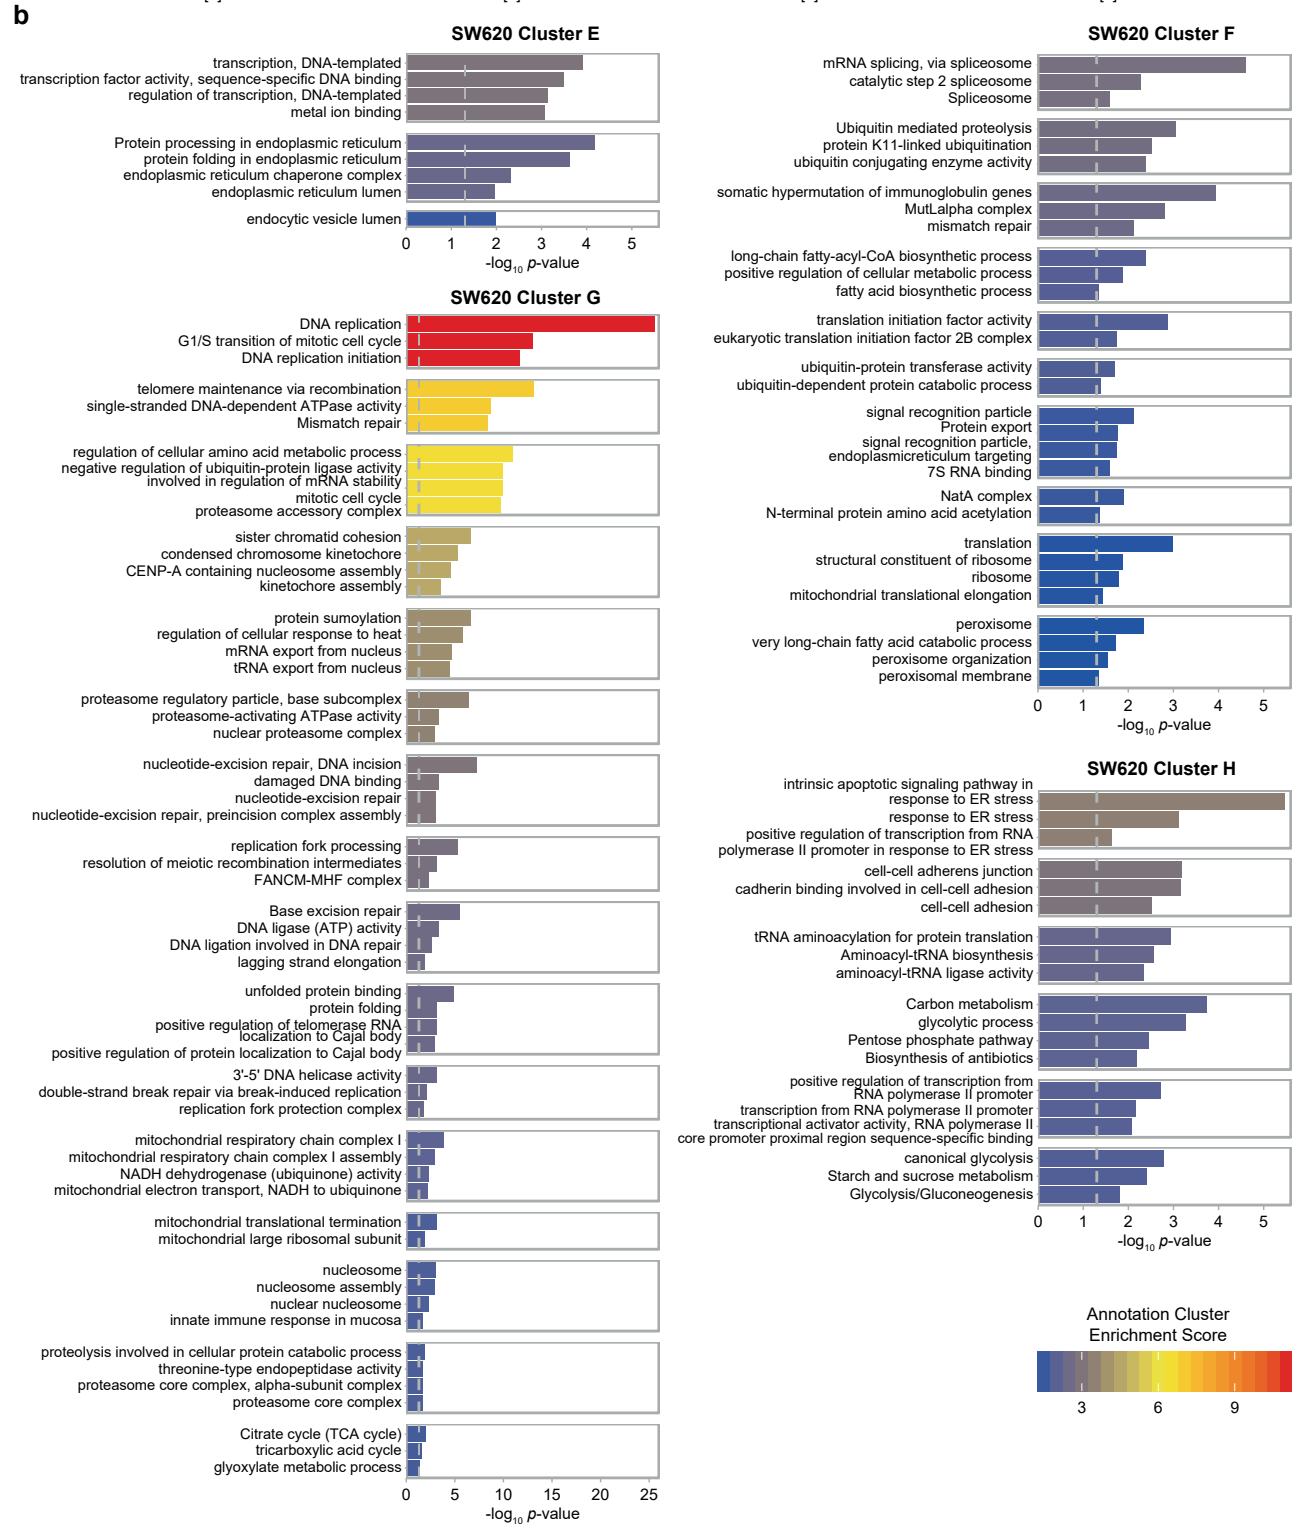

Supplement: mmc5.pdf [file mmc5.pdf]

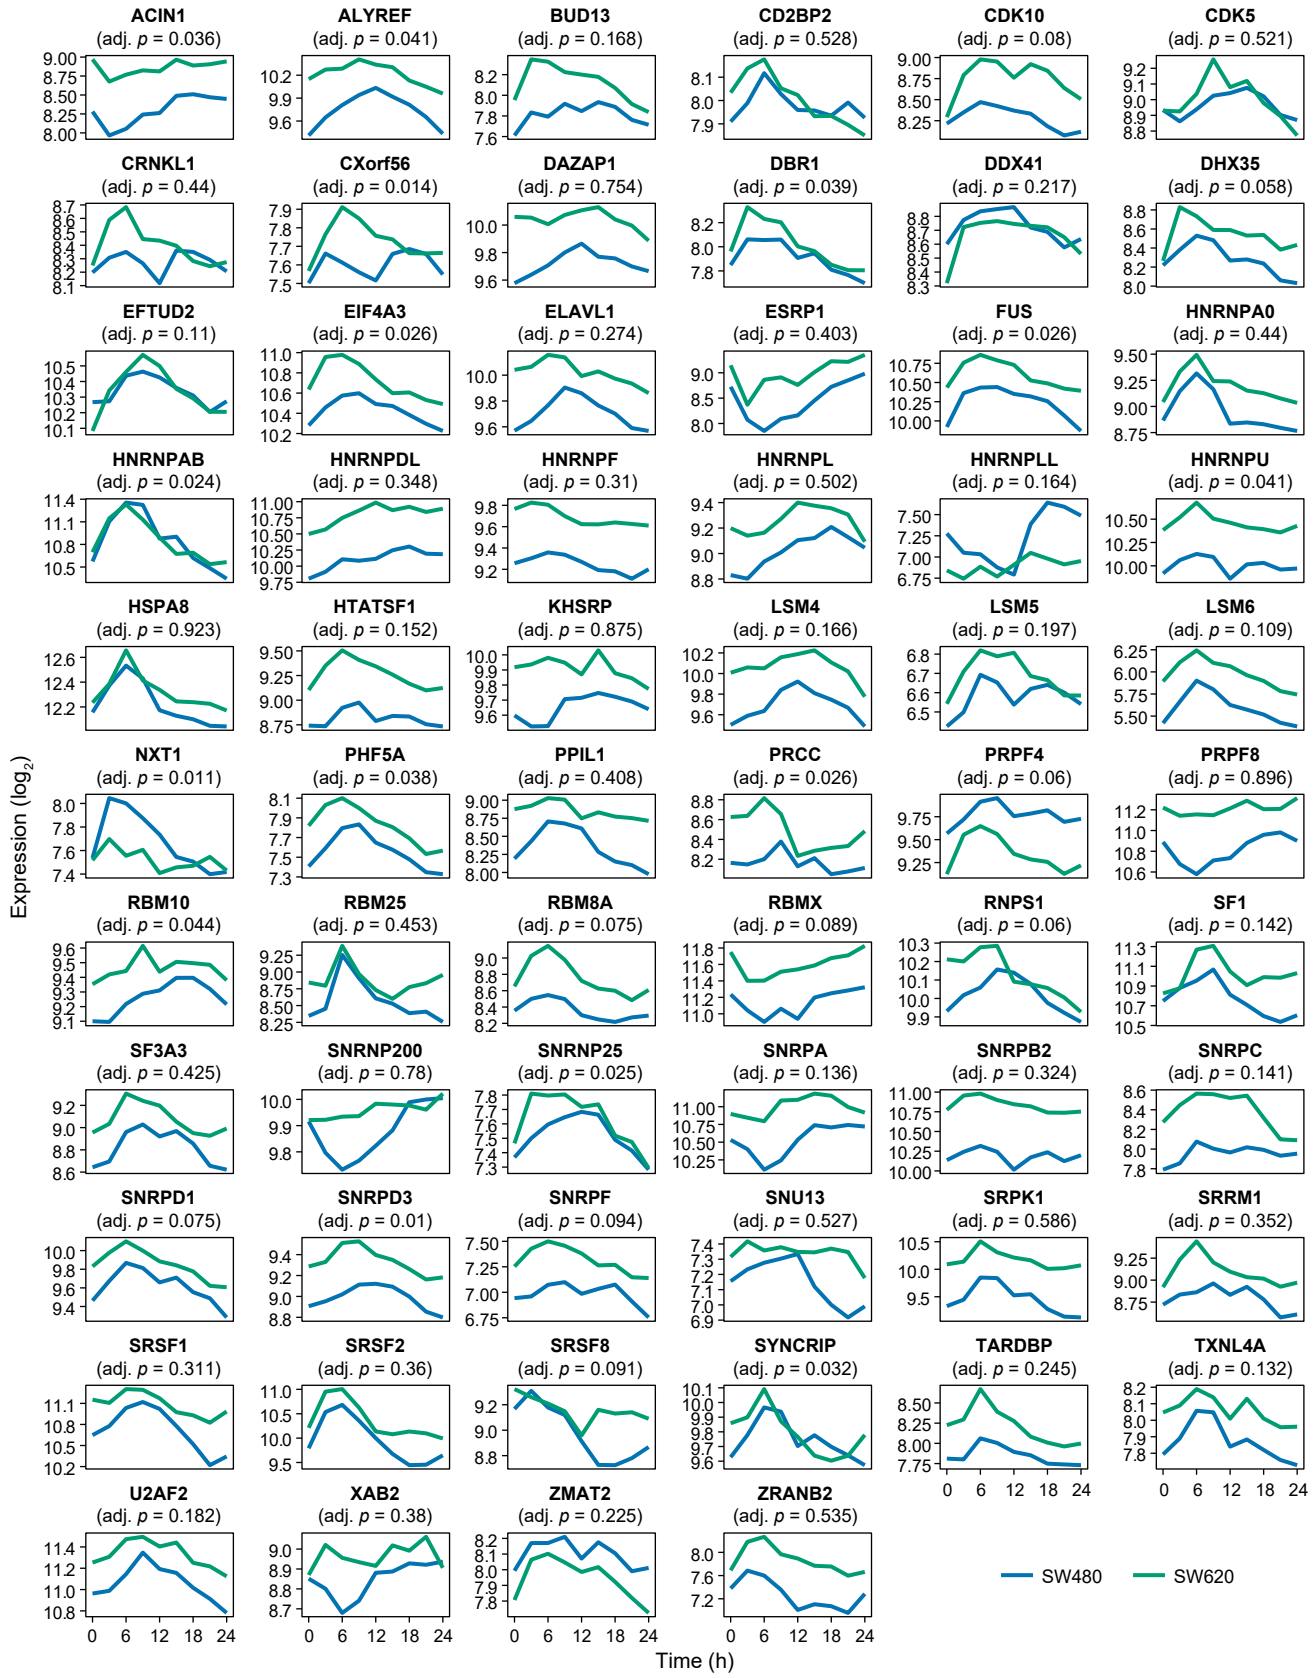

Supplement: mmc6.pdf [file mmc6.pdf]

**a**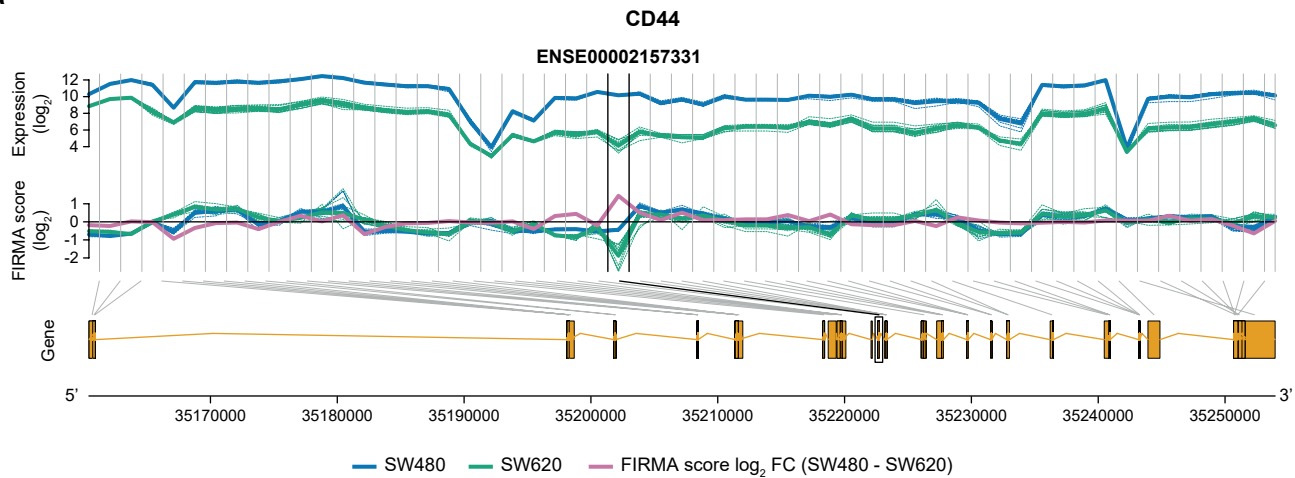**b**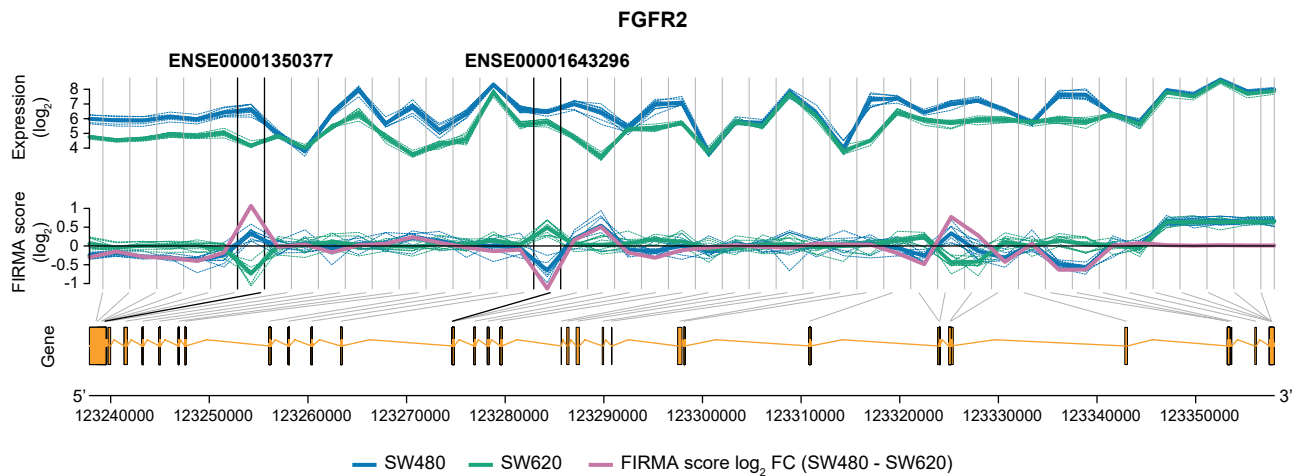

Supplement: mmc7.pdf [file mmc7.pdf]

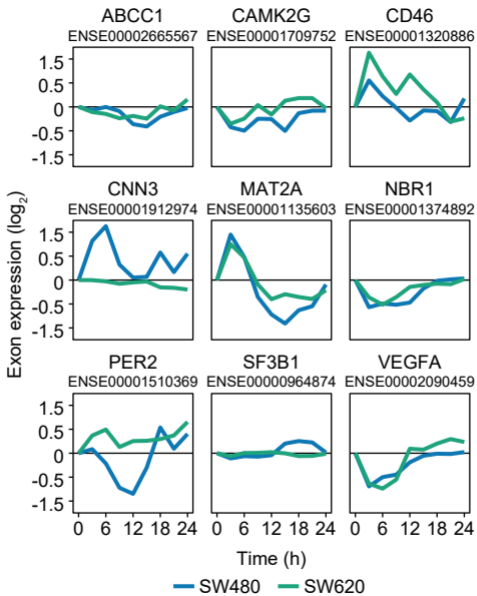

Supplement: mmc8.pdf [file mmc8.pdf]
